# Supplementary material
Source: PubMed Central journal article supplement (PMC4227567)
Supplement: ijc0135-2338-SD8.pdf [file ijc0135-2338-SD8.pdf]

**Table S3** Patient histoclinical characteristics and  $\beta 1$  expression.

| Variable                     | $\beta$ expression |           | P    |
|------------------------------|--------------------|-----------|------|
|                              | Low (%)            | High (%)  |      |
| Age                          |                    |           |      |
| ≤50                          | 8 (12.3)           | 17 (26.2) | 0.23 |
| >50                          | 7 (10.8)           | 33 (50.8) |      |
| ER                           |                    |           |      |
| -                            | 7 (10.6)           | 27 (40.9) | 0.77 |
| +                            | 8 (12.1)           | 24 (36.4) |      |
| Grade                        |                    |           |      |
| 1                            | 3 (4.5)            | 2 (3.0)   | 0.10 |
| 2                            | 7 (10.6)           | 33 (50.0) |      |
| 3                            | 5 (7.6)            | 16 (24.2) |      |
| Menopausal status            |                    |           |      |
| Premenopausal                | 7 (10.6)           | 21 (31.8) | 0.77 |
| Postmenopausal               | 8 (12.1)           | 30 (45.5) |      |
| Node status                  |                    |           |      |
| -                            | 7 (10.8)           | 20 (30.8) | 0.77 |
| +                            | 8 (12.3)           | 30 (46.2) |      |
| 5-year BCa-specific survival |                    |           |      |
| Alive                        | 11 (18.0)          | 47 (77.0) | 0.11 |
| Dead                         | 2 (3.3)            | 1 (1.6)   |      |

P values are from Fisher's exact tests except for grade, which is from  $\chi^2$  tests.
